# Supplementary material
Source: MDPI journal article supplement (https://www.mdpi.com/1999-4907/13/4/626)

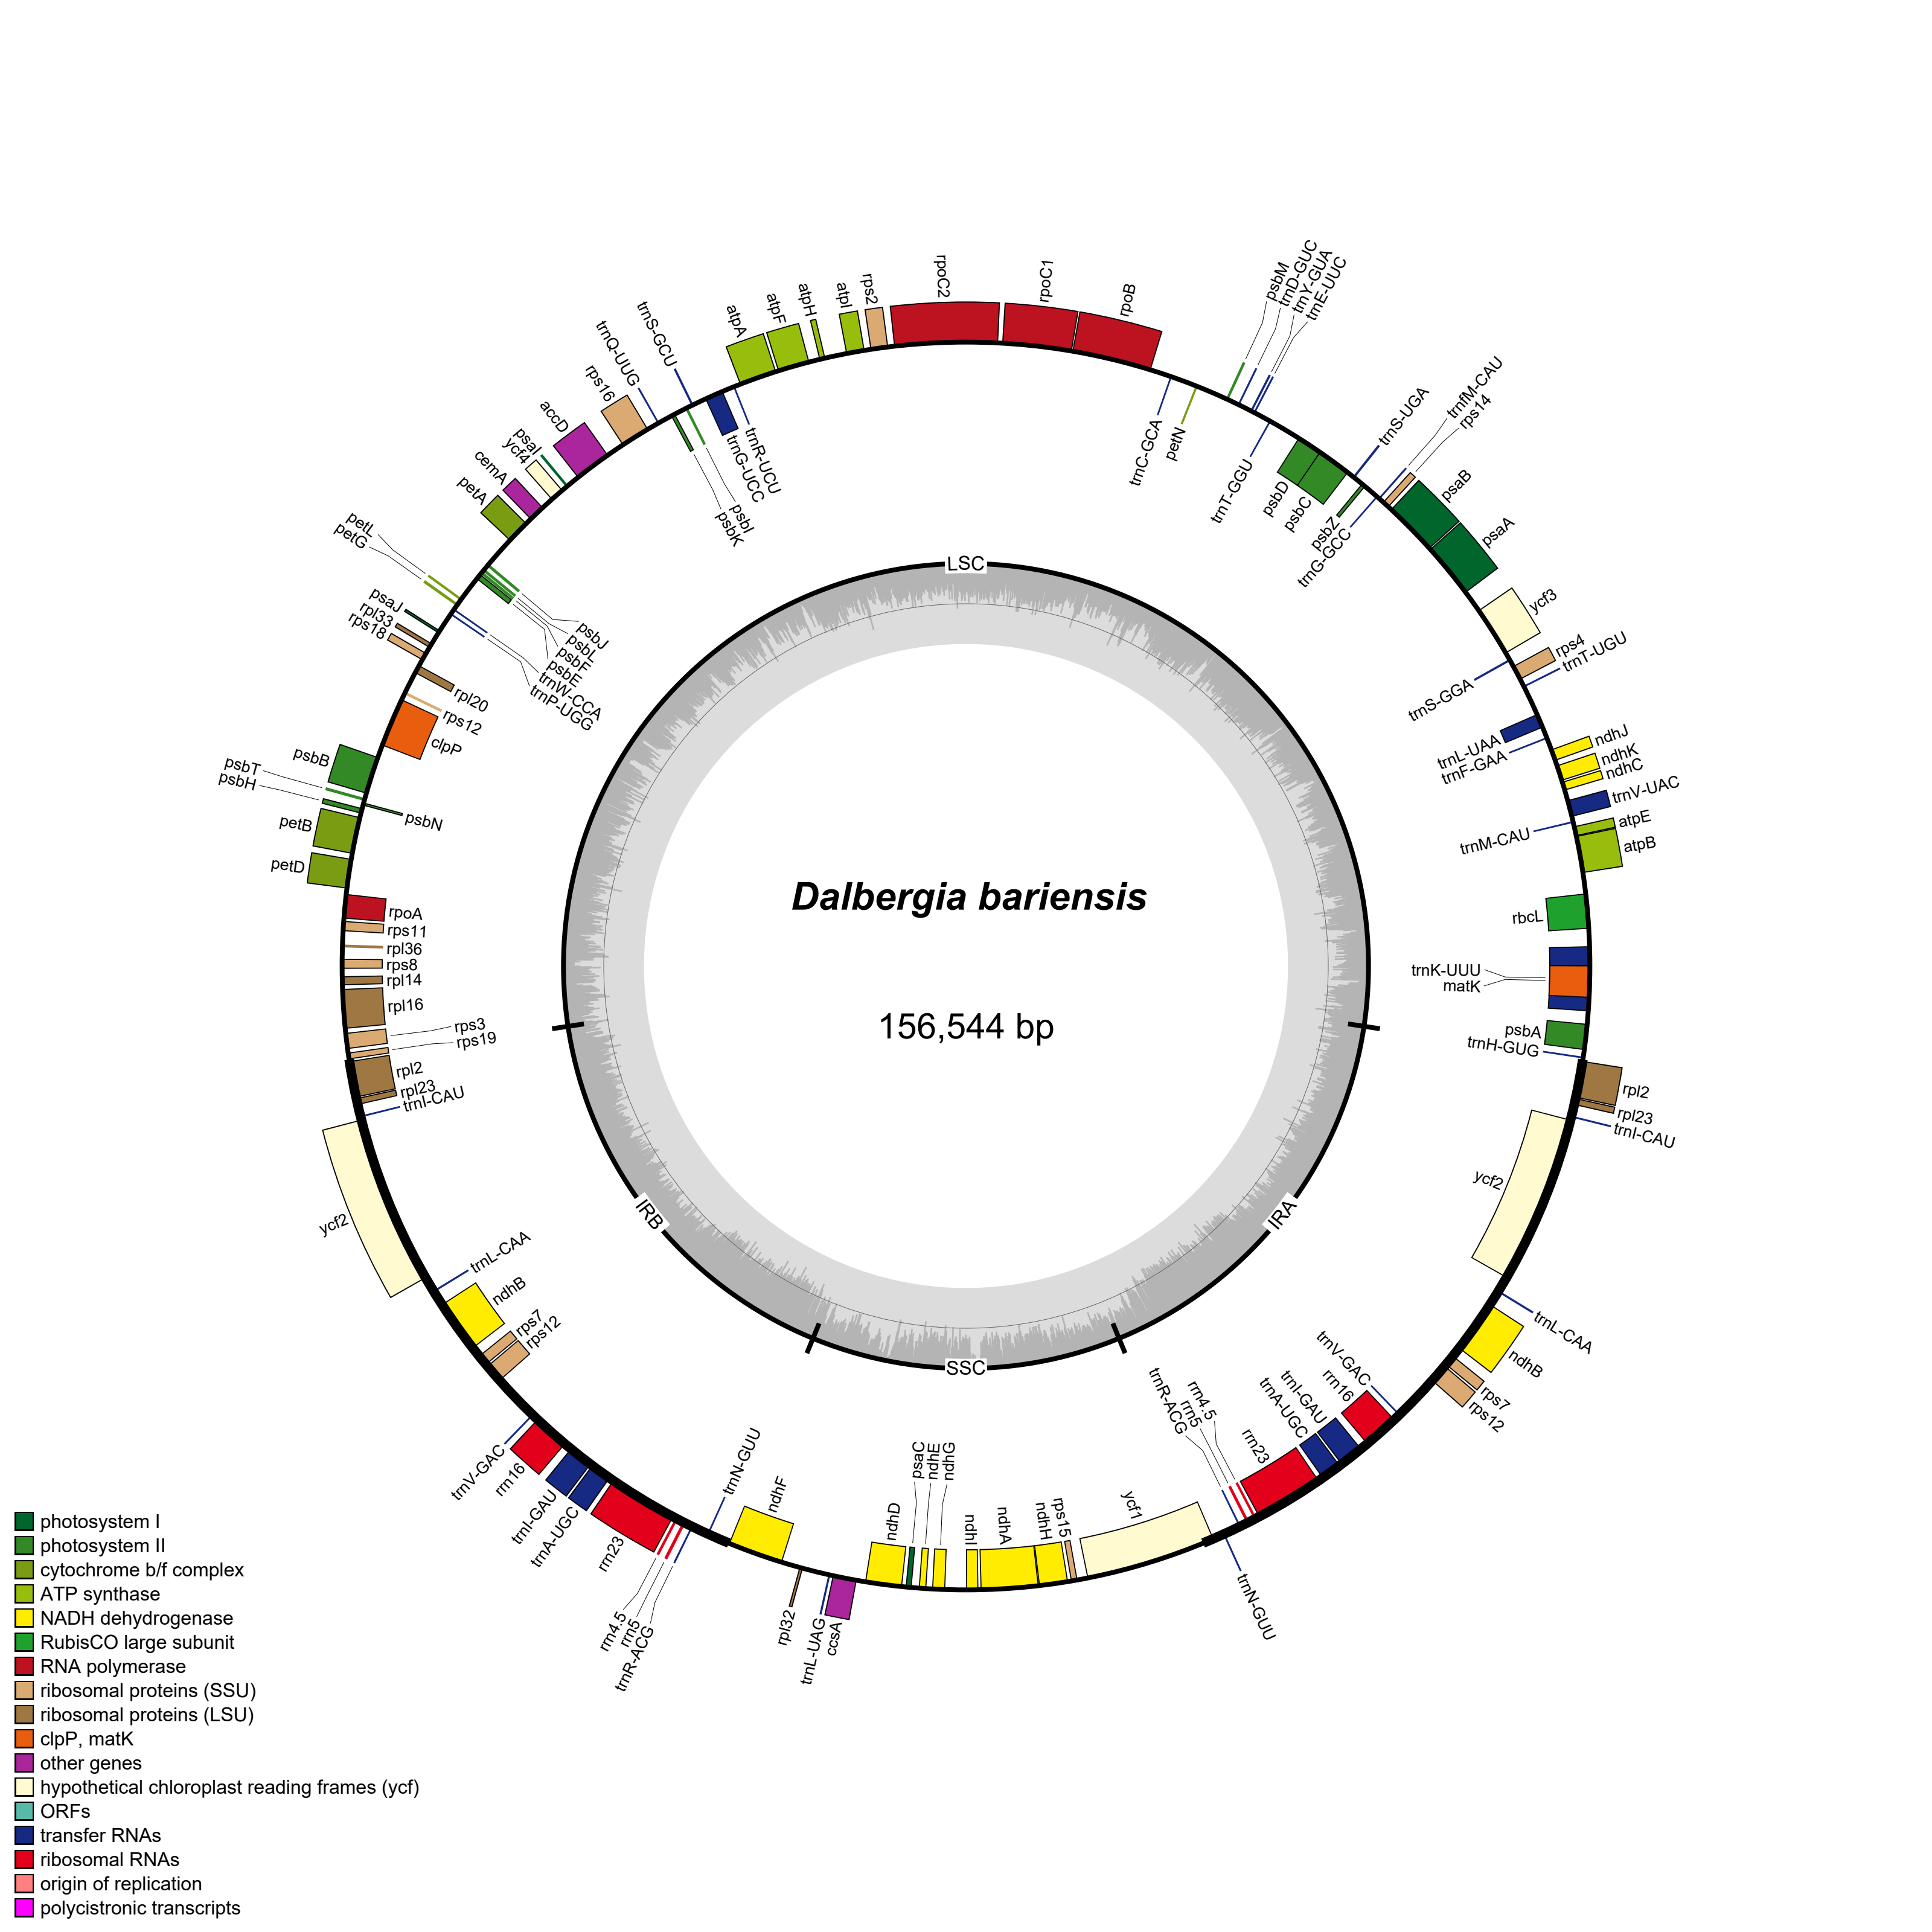

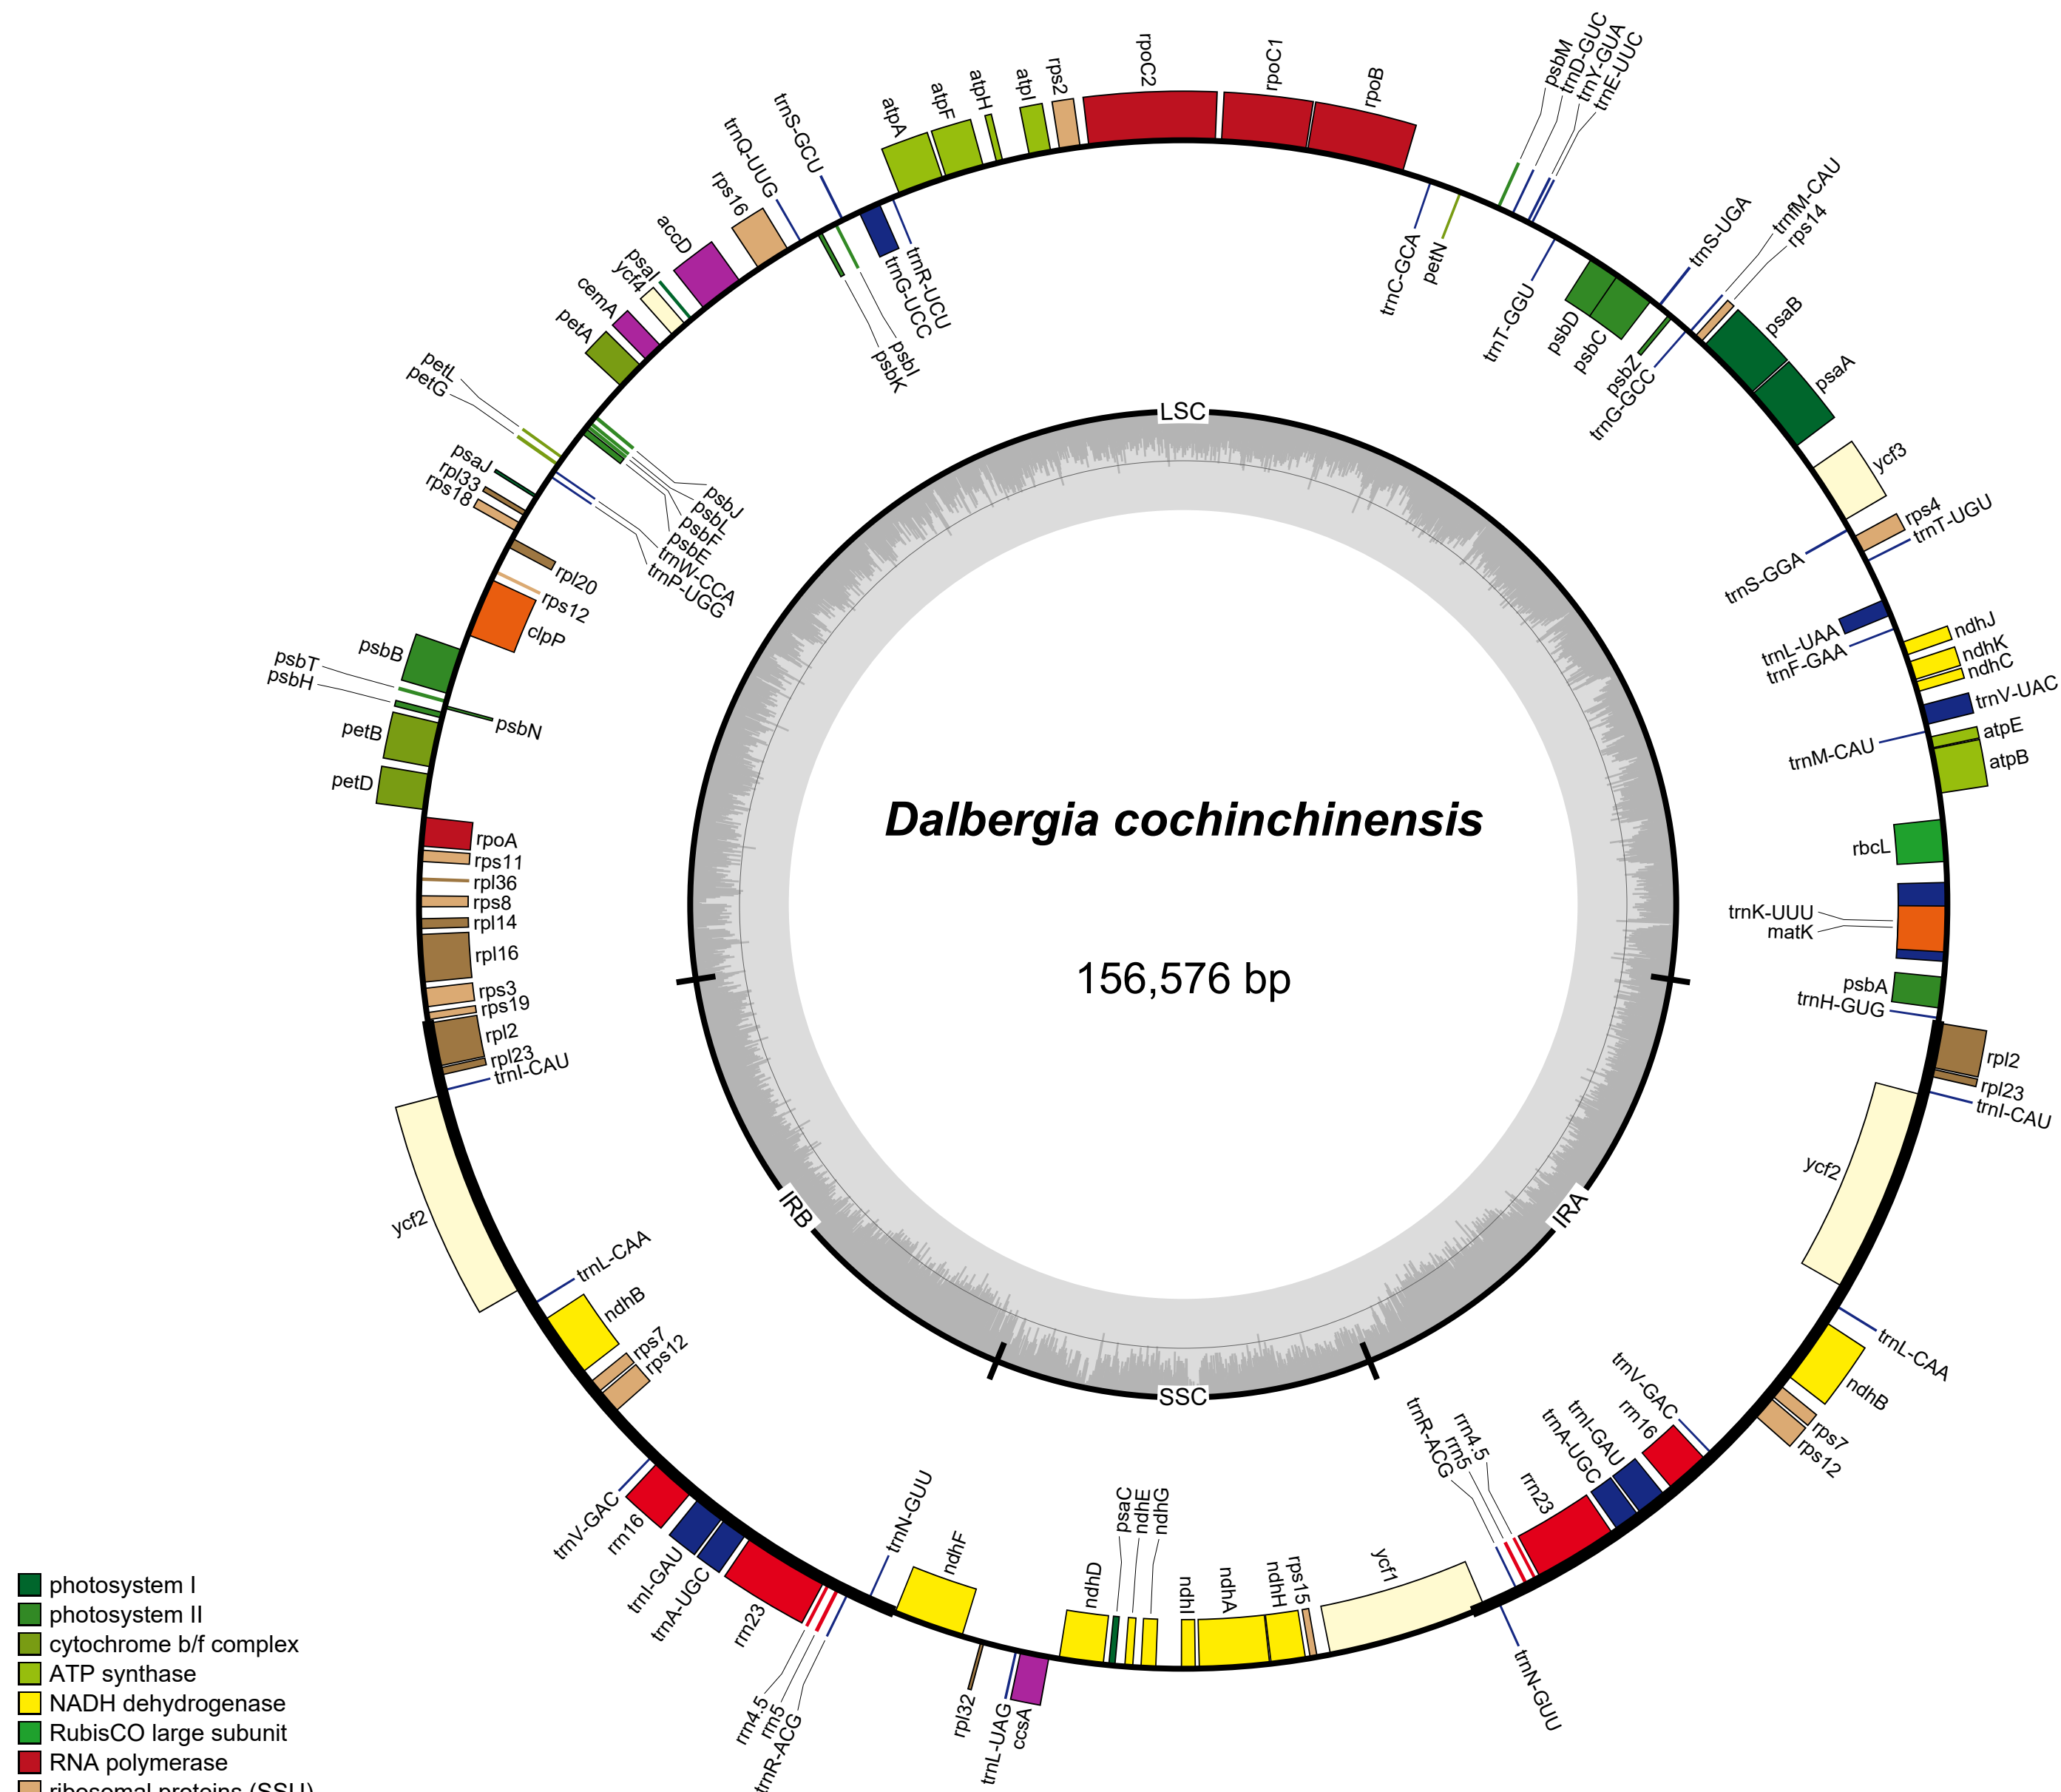

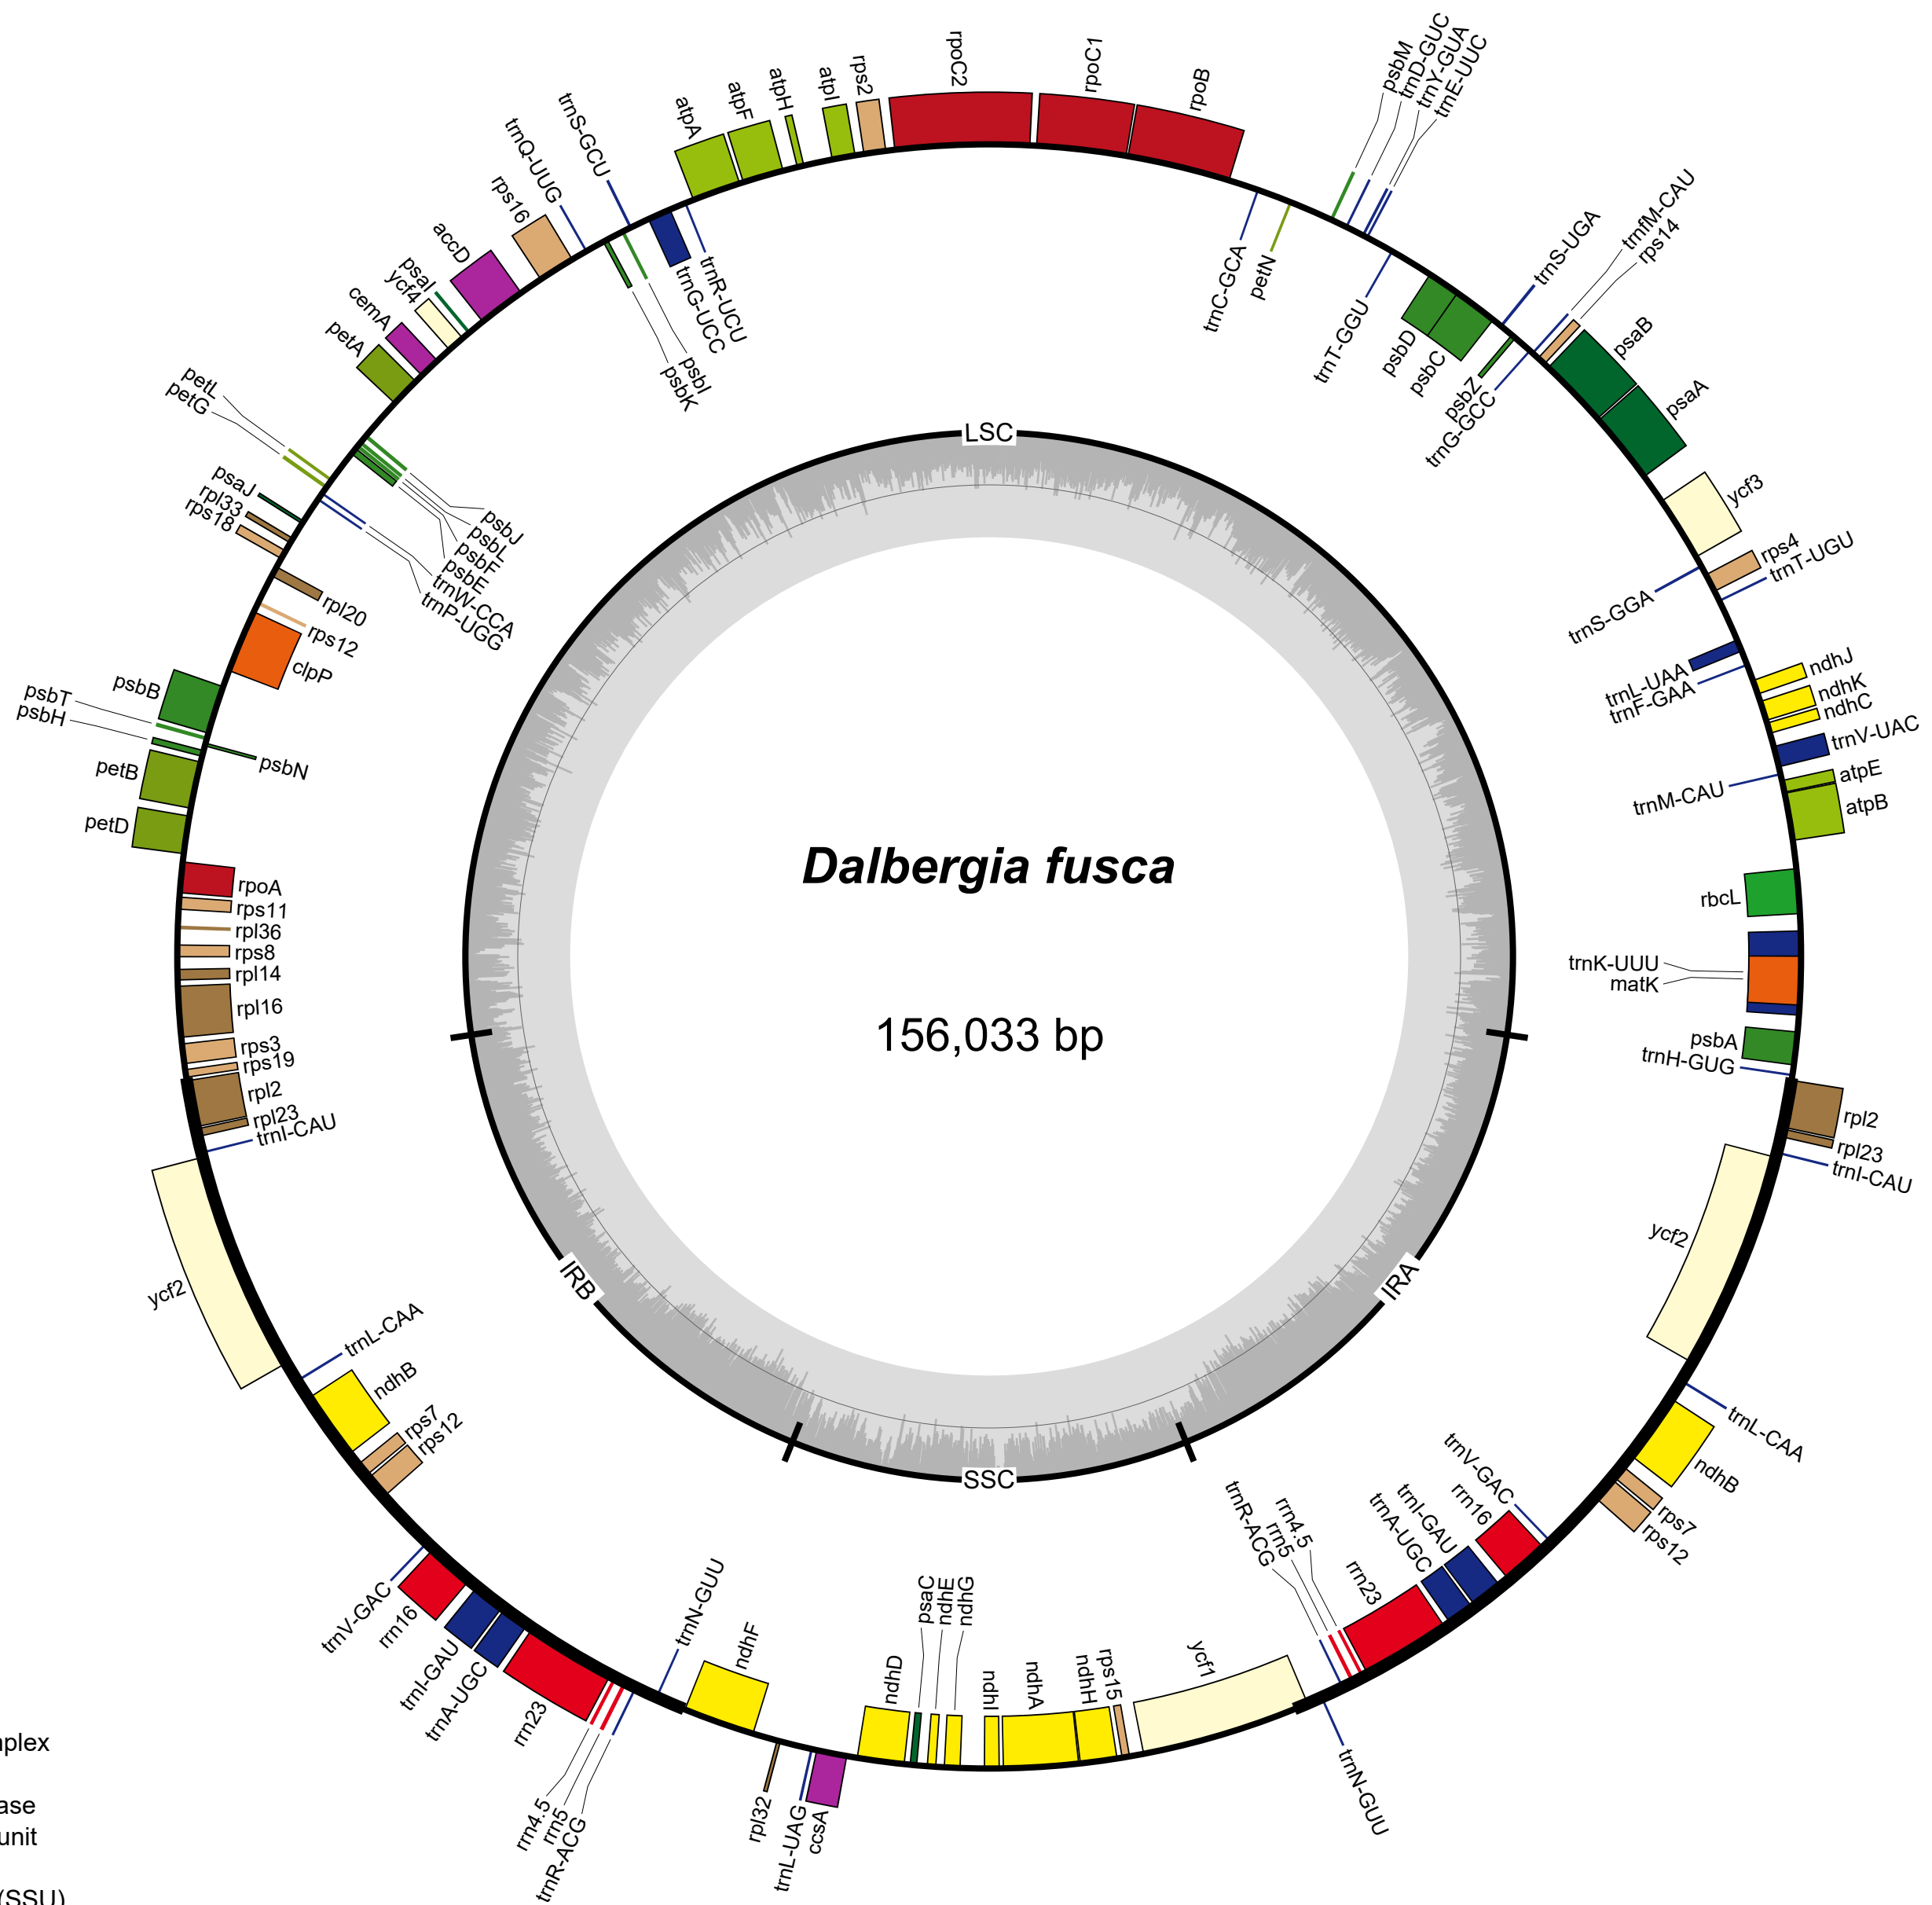

-  photosystem I
-  photosystem II
-  cytochrome b/f complex
-  ATP synthase
-  NADH dehydrogenase
-  RubisCO large subunit
-  RNA polymerase
-  ribosomal proteins (SSU)
-  ribosomal proteins (LSU)
-  clpP, matK
-  other genes
-  hypothetical chloroplast reading frames (ycf)
-  ORFs
-  transfer RNAs
-  ribosomal RNAs
-  origin of replication
-  polycistronic transcripts



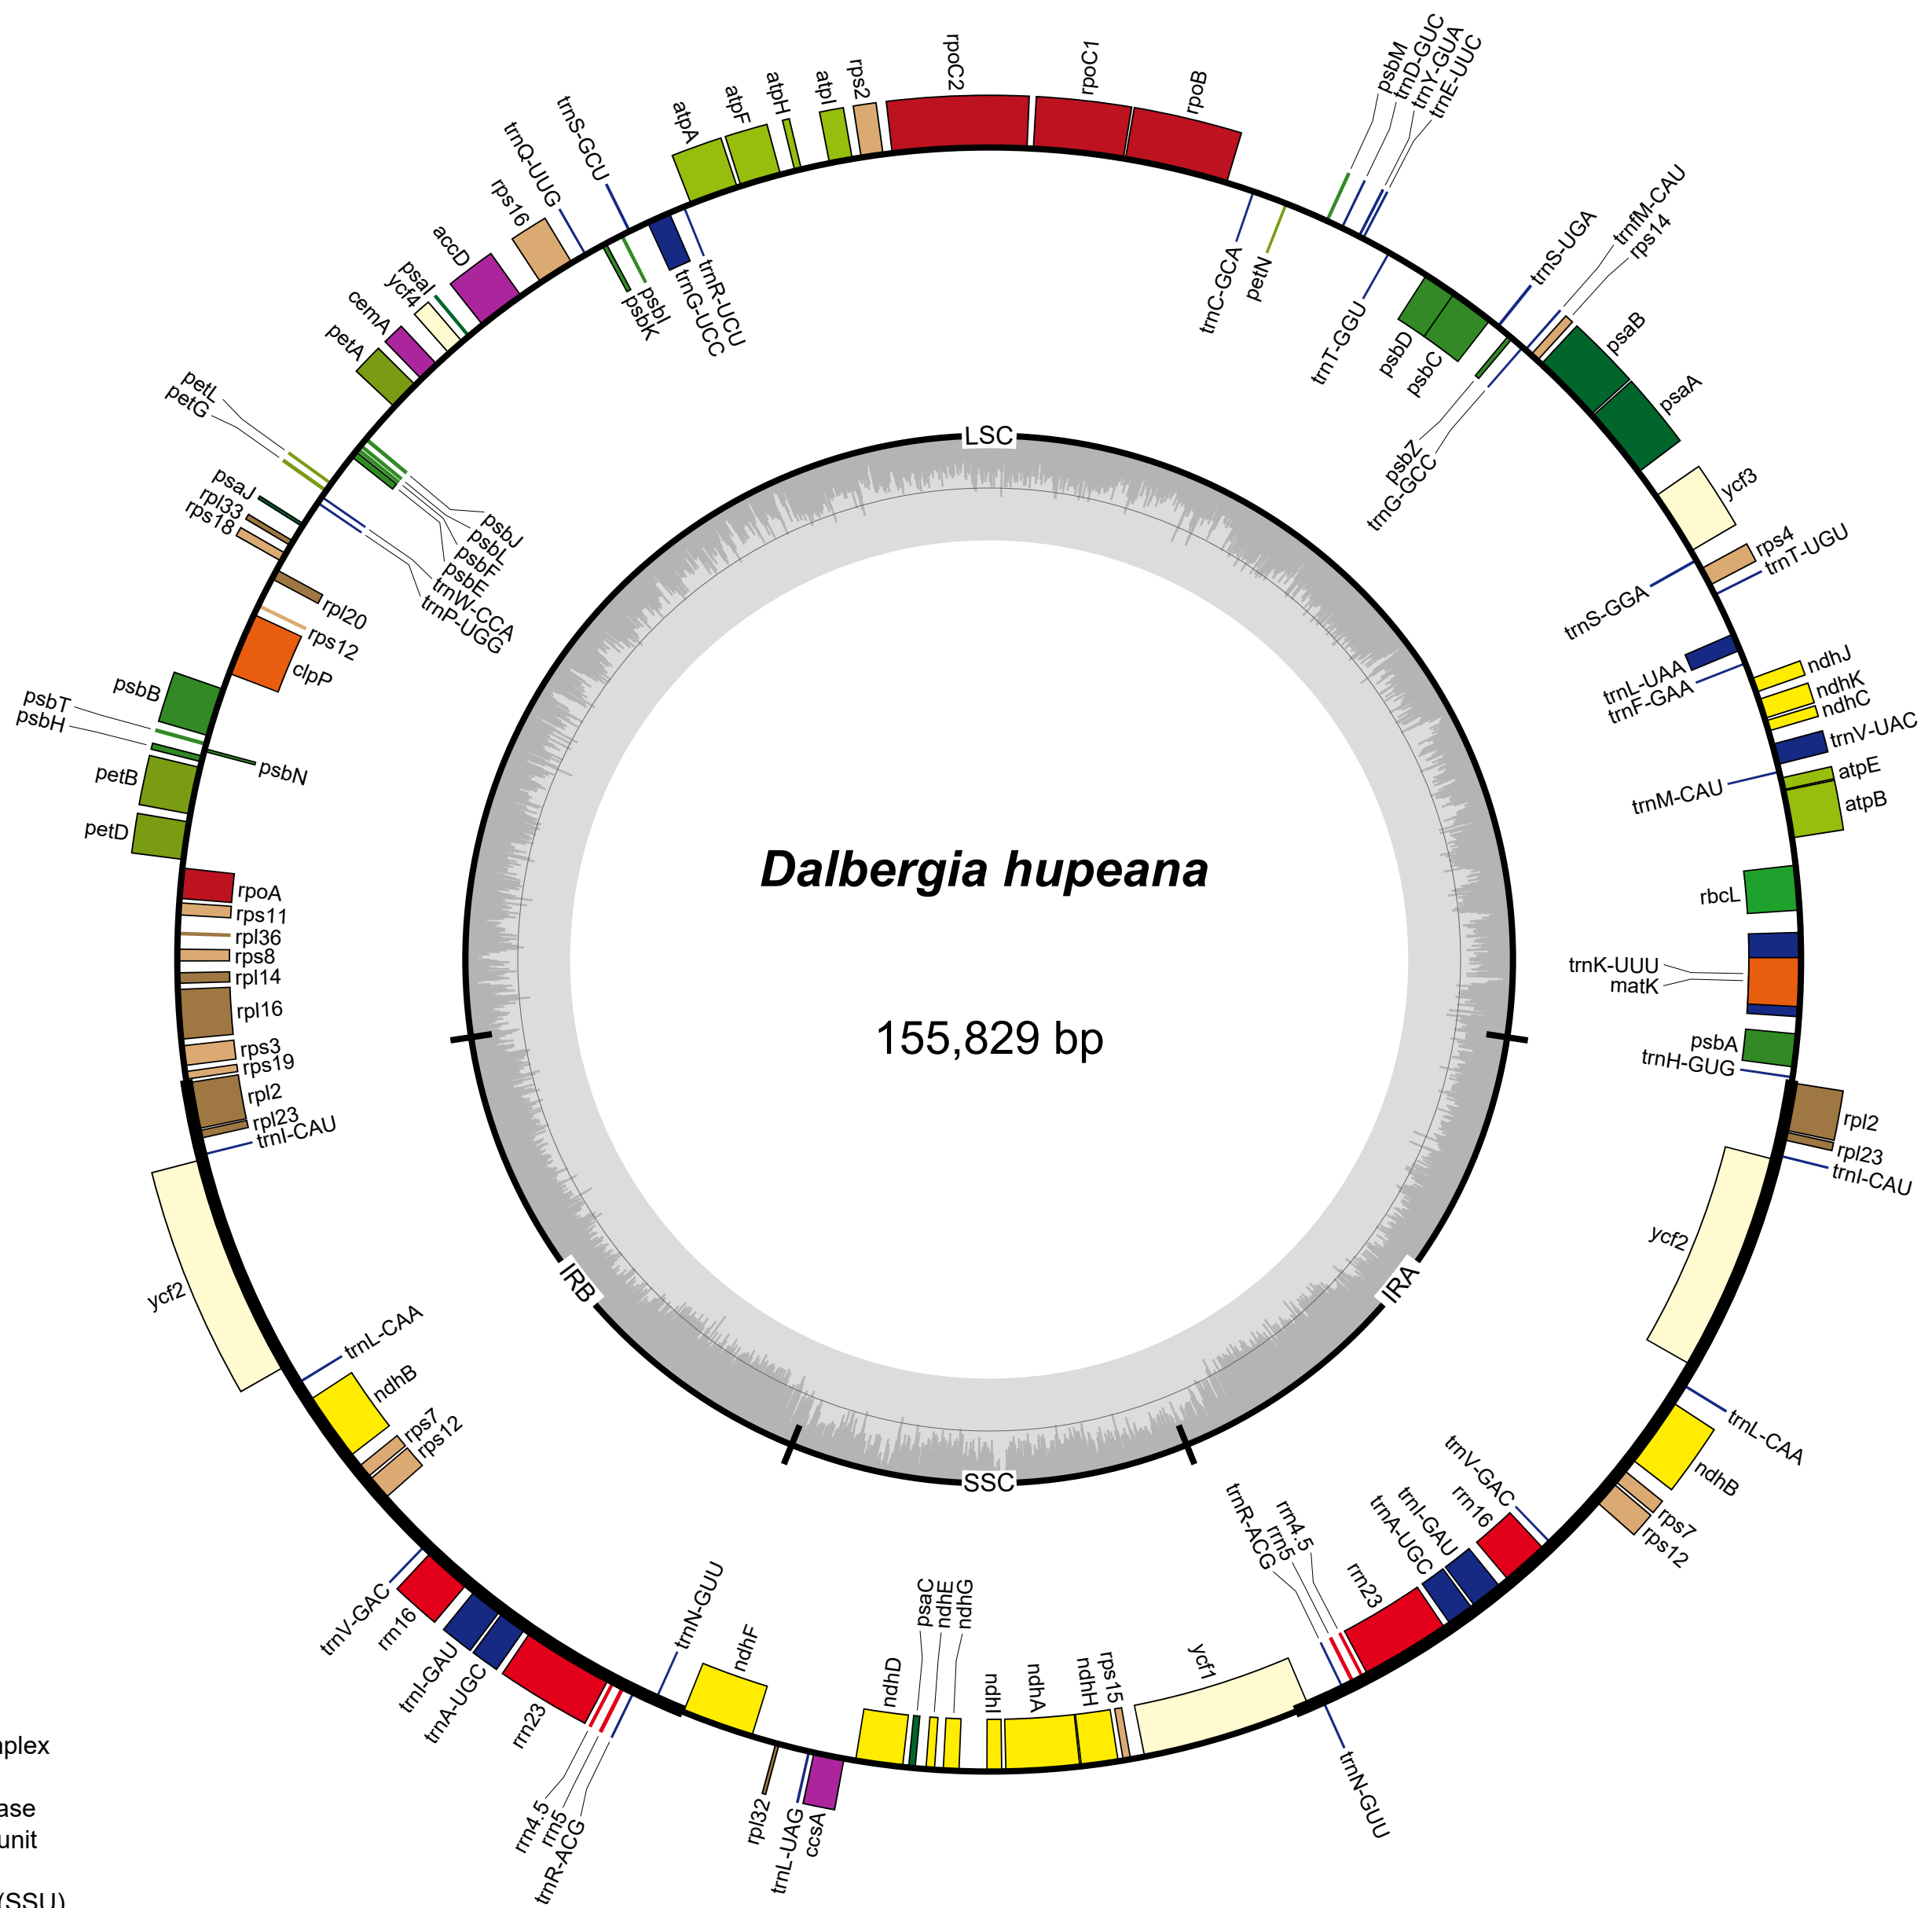

-  photosystem I
-  photosystem II
-  cytochrome b/f complex
-  ATP synthase
-  NADH dehydrogenase
-  RubisCO large subunit
-  RNA polymerase
-  ribosomal proteins (SSU)
-  ribosomal proteins (LSU)
-  clpP, matK
-  other genes
-  hypothetical chloroplast reading frames (ycf)
-  ORFs
-  transfer RNAs
-  ribosomal RNAs
-  origin of replication
-  polycistronic transcripts

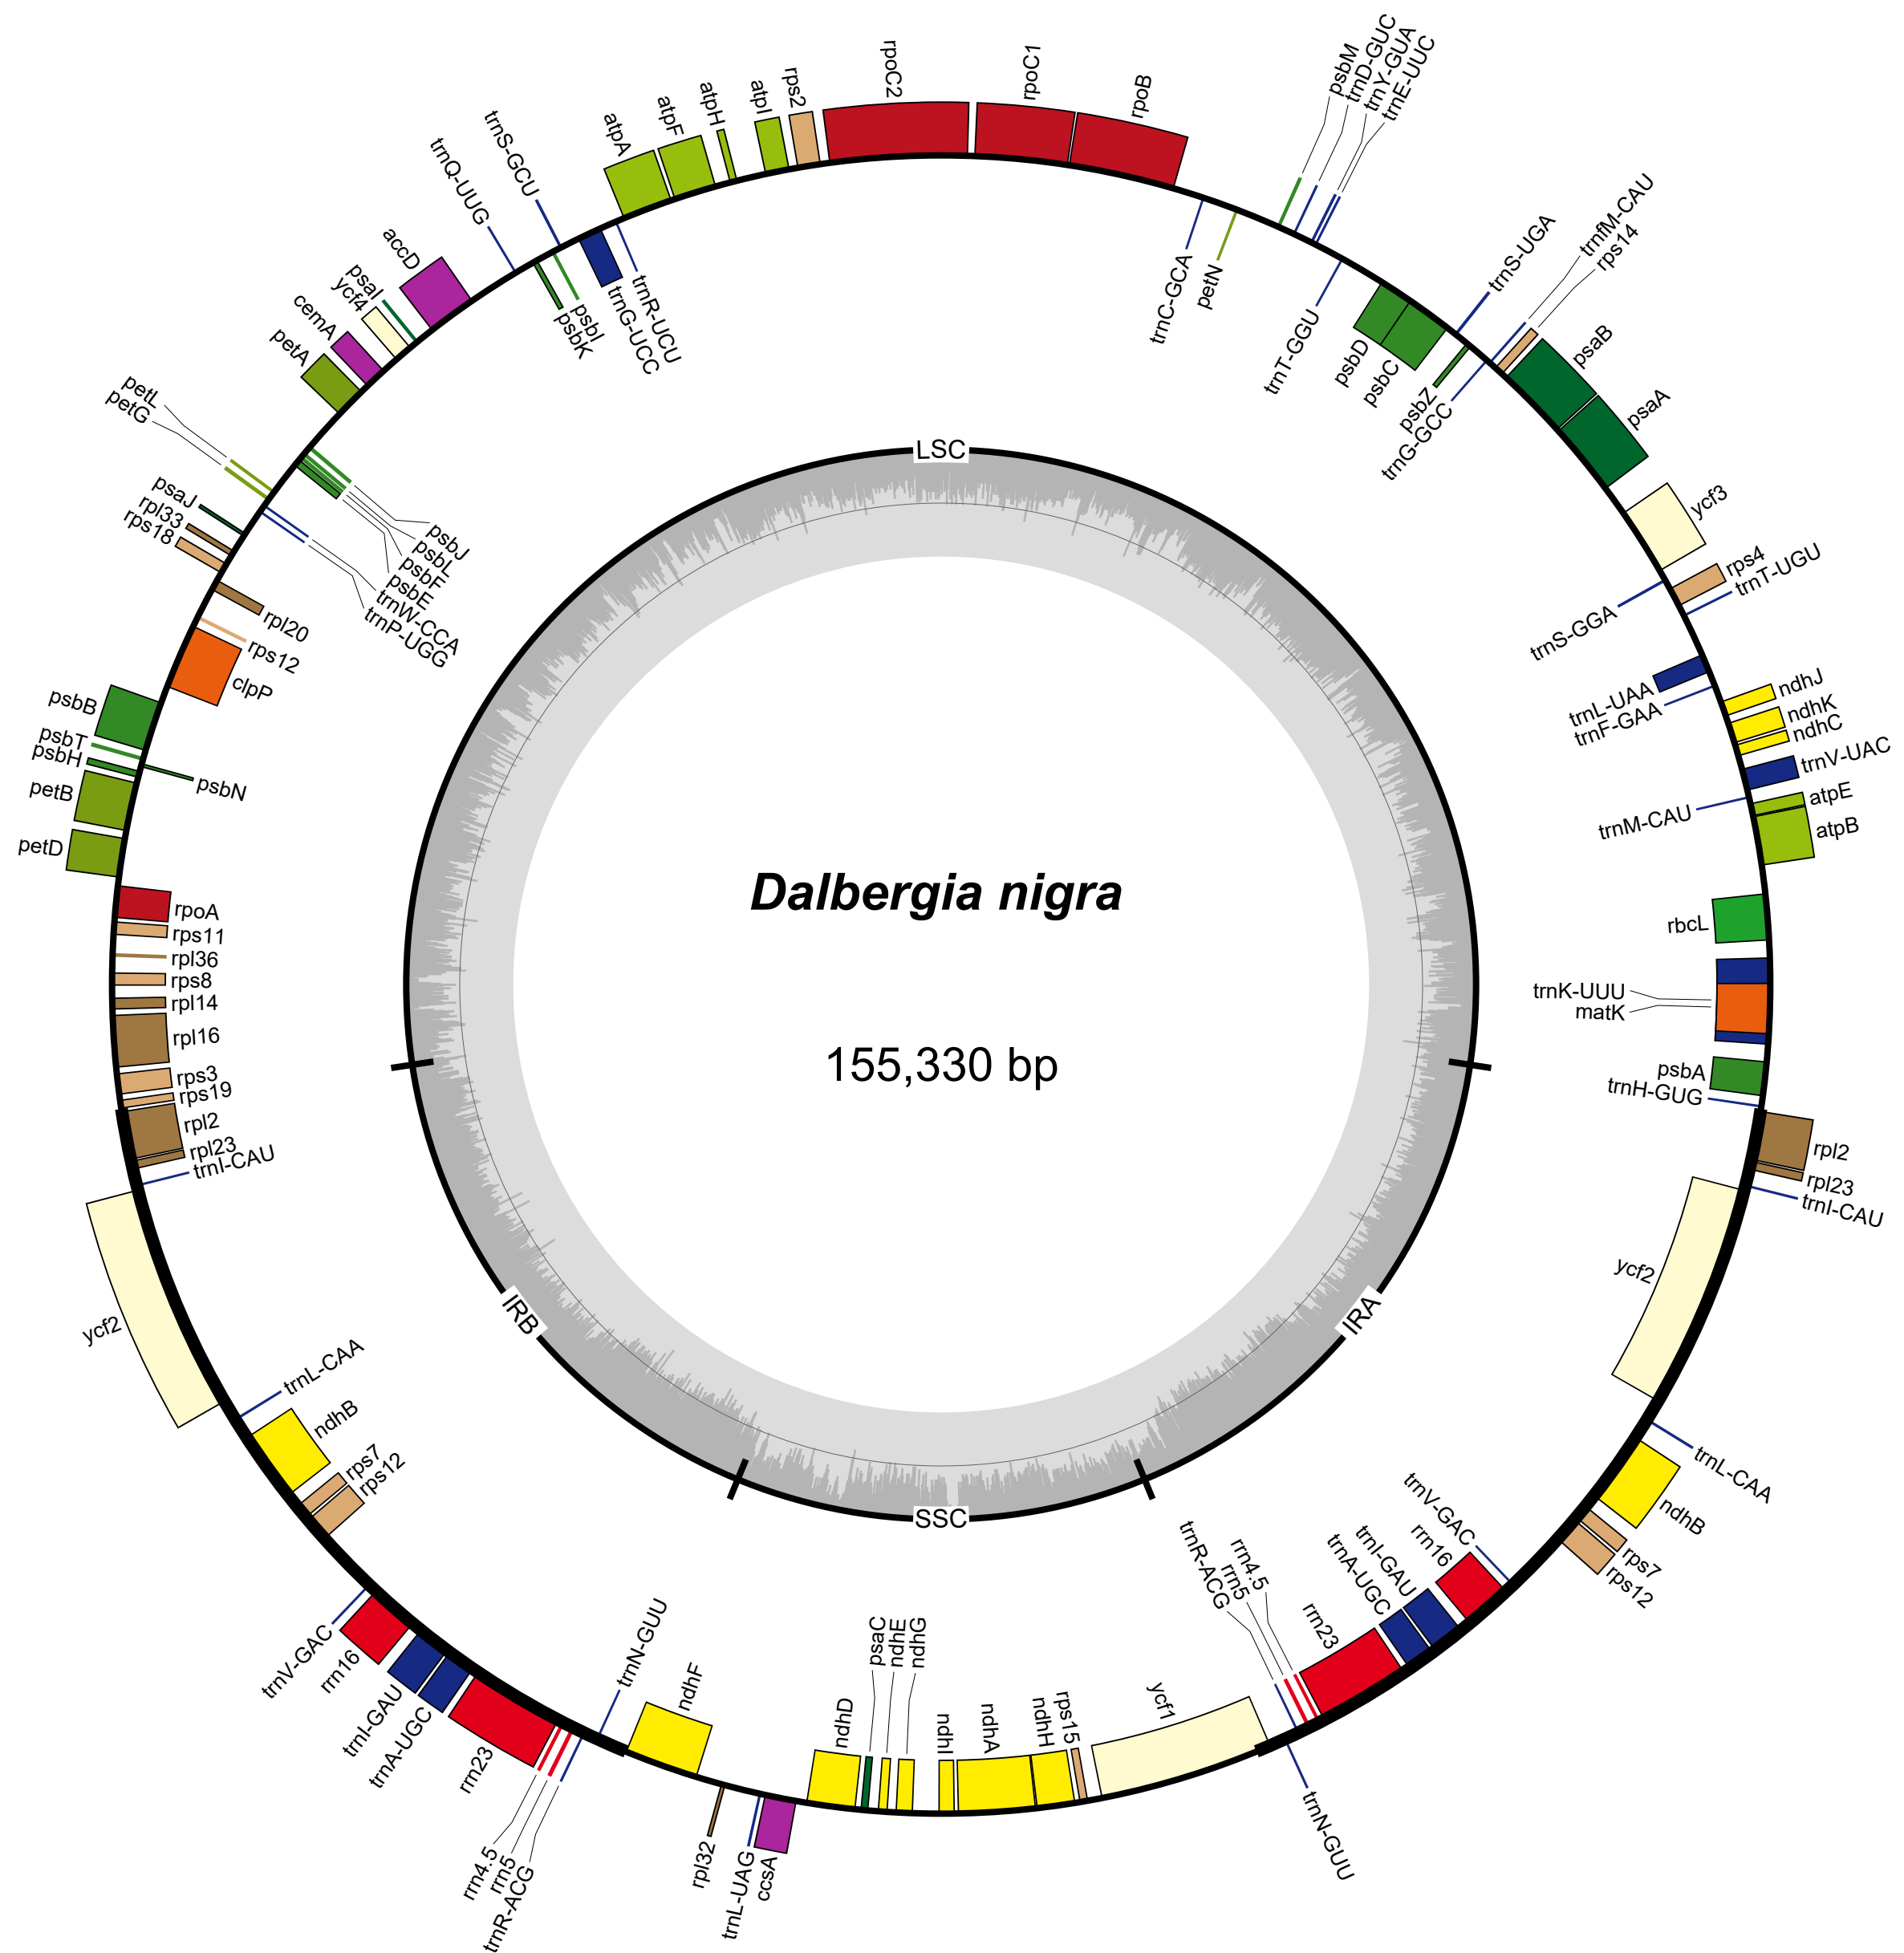

-  photosystem I
-  photosystem II
-  cytochrome b/f complex
-  ATP synthase
-  NADH dehydrogenase
-  RubisCO large subunit
-  RNA polymerase
-  ribosomal proteins (SSU)
-  ribosomal proteins (LSU)
-  clpP, matK
-  other genes
-  hypothetical chloroplast reading frames (ycf)
-  ORFs
-  transfer RNAs
-  ribosomal RNAs
-  origin of replication
-  polycistronic transcripts

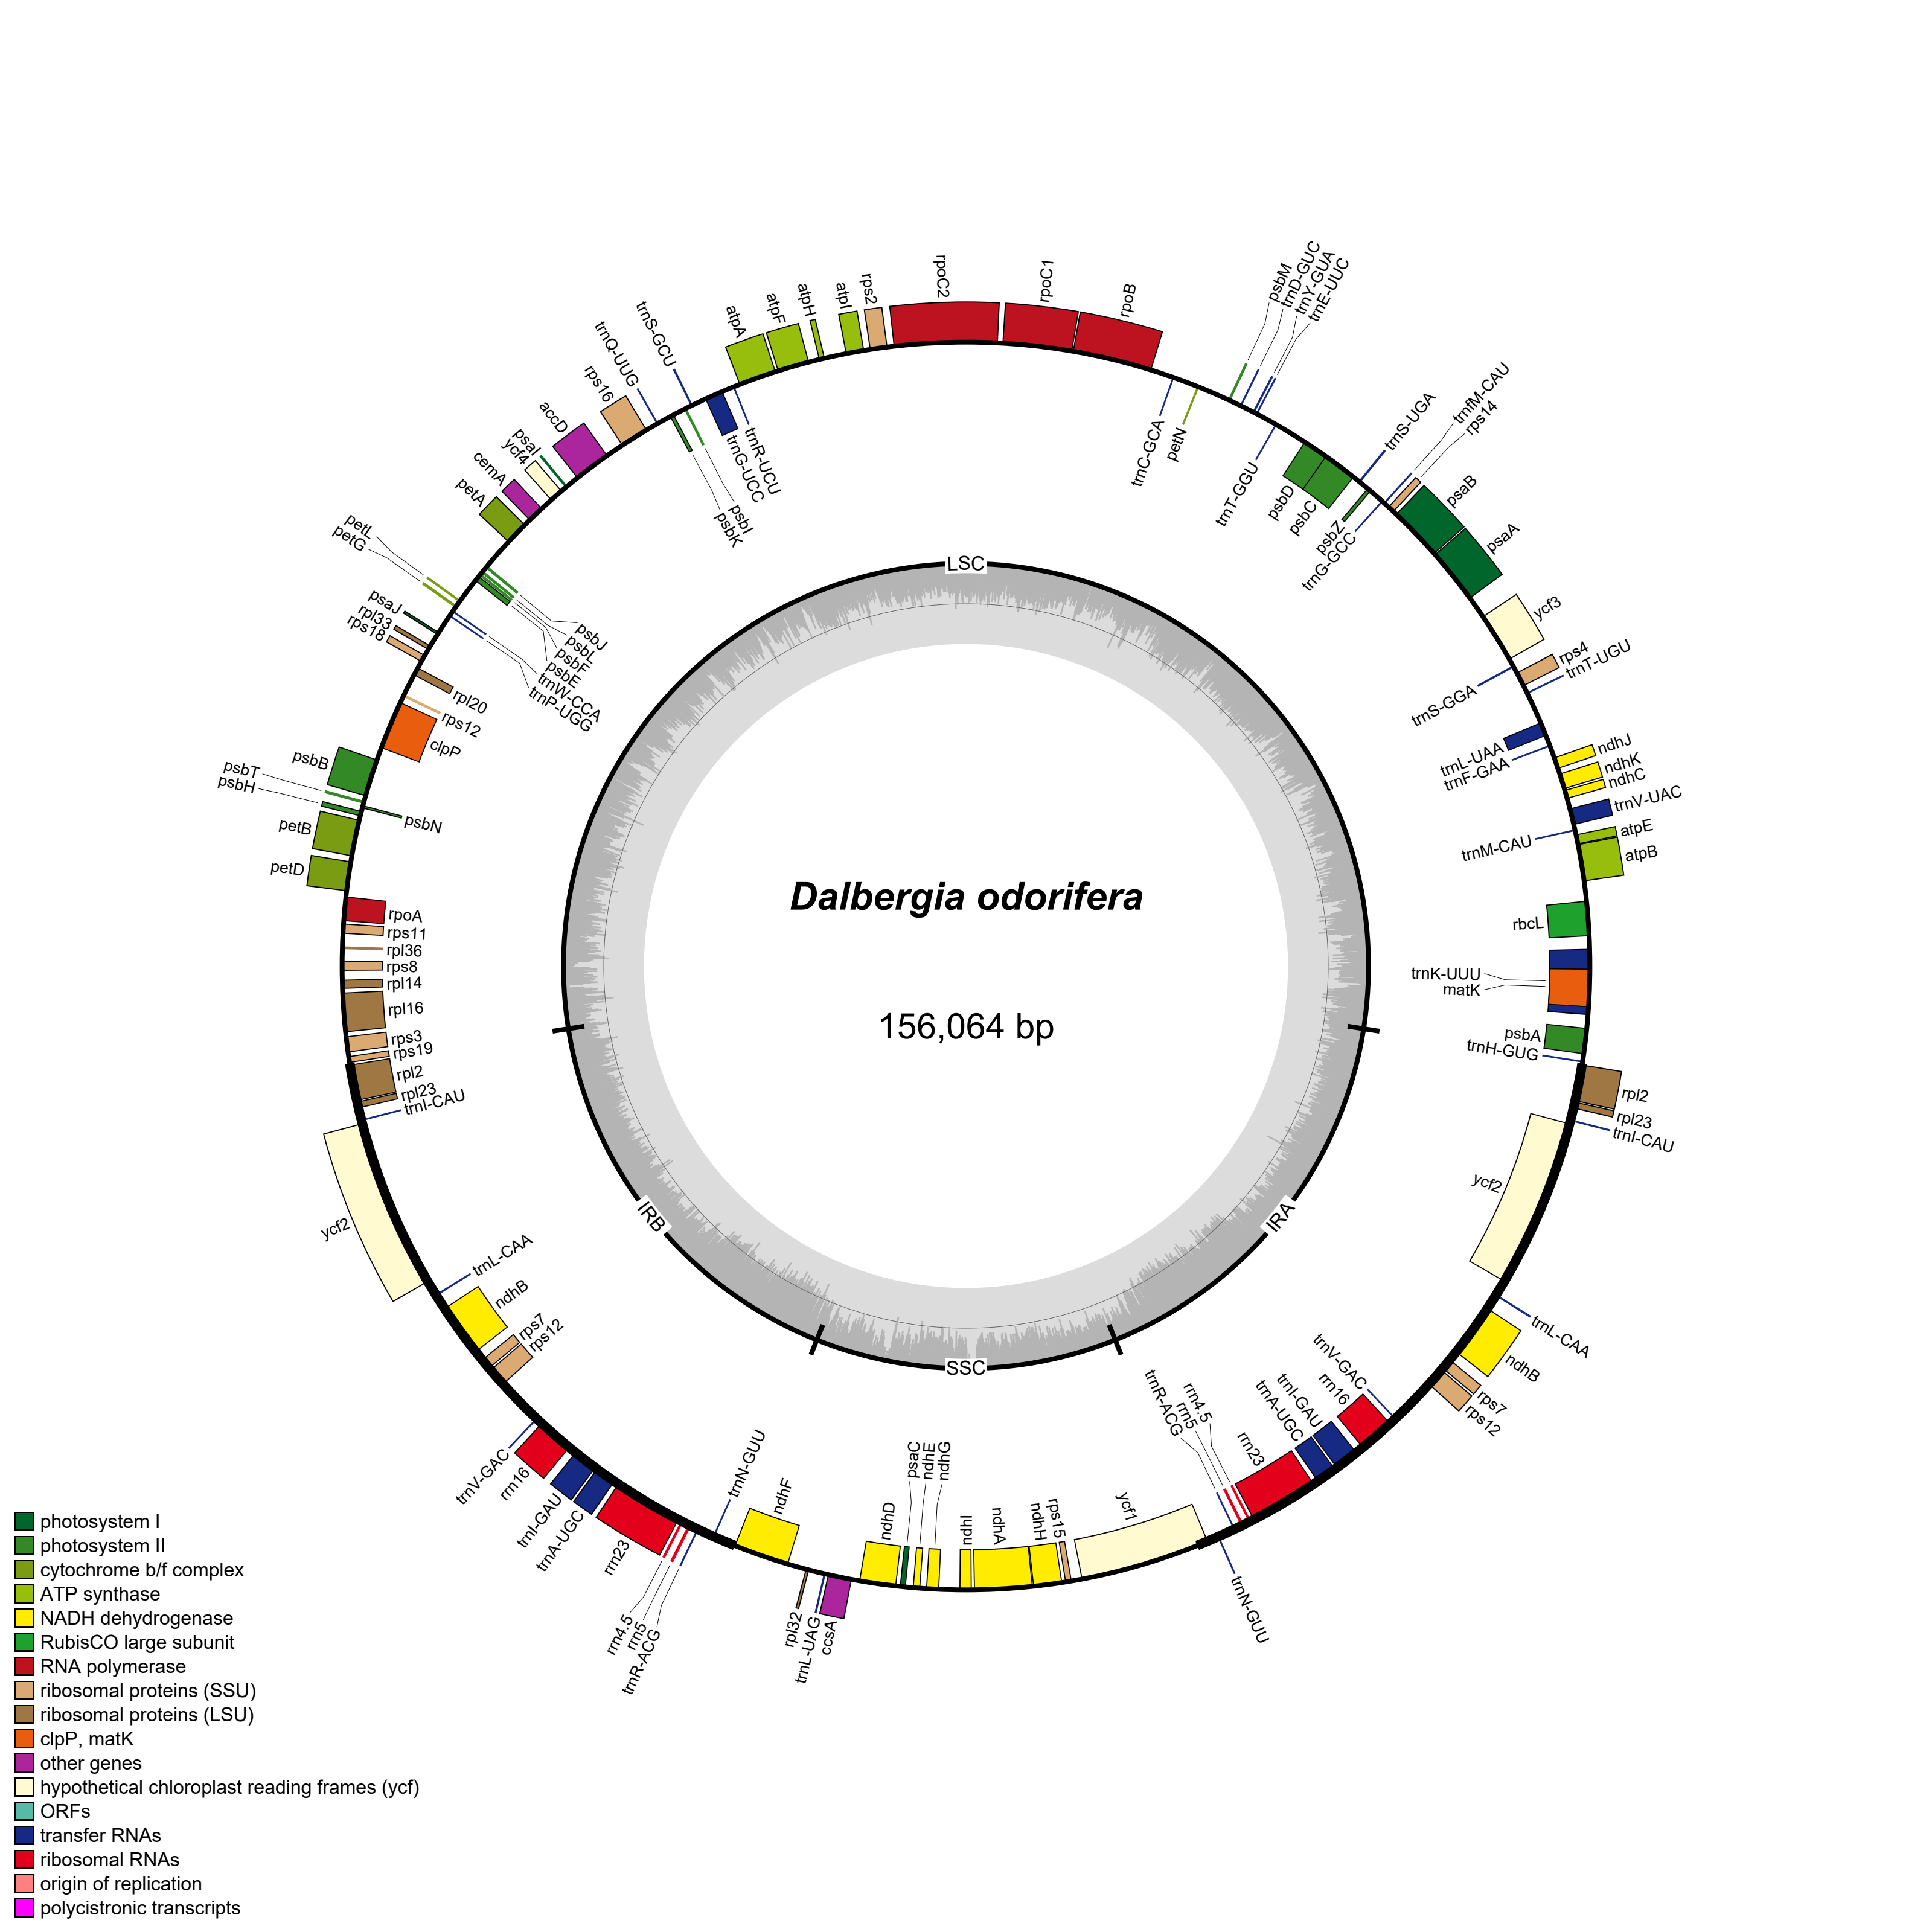



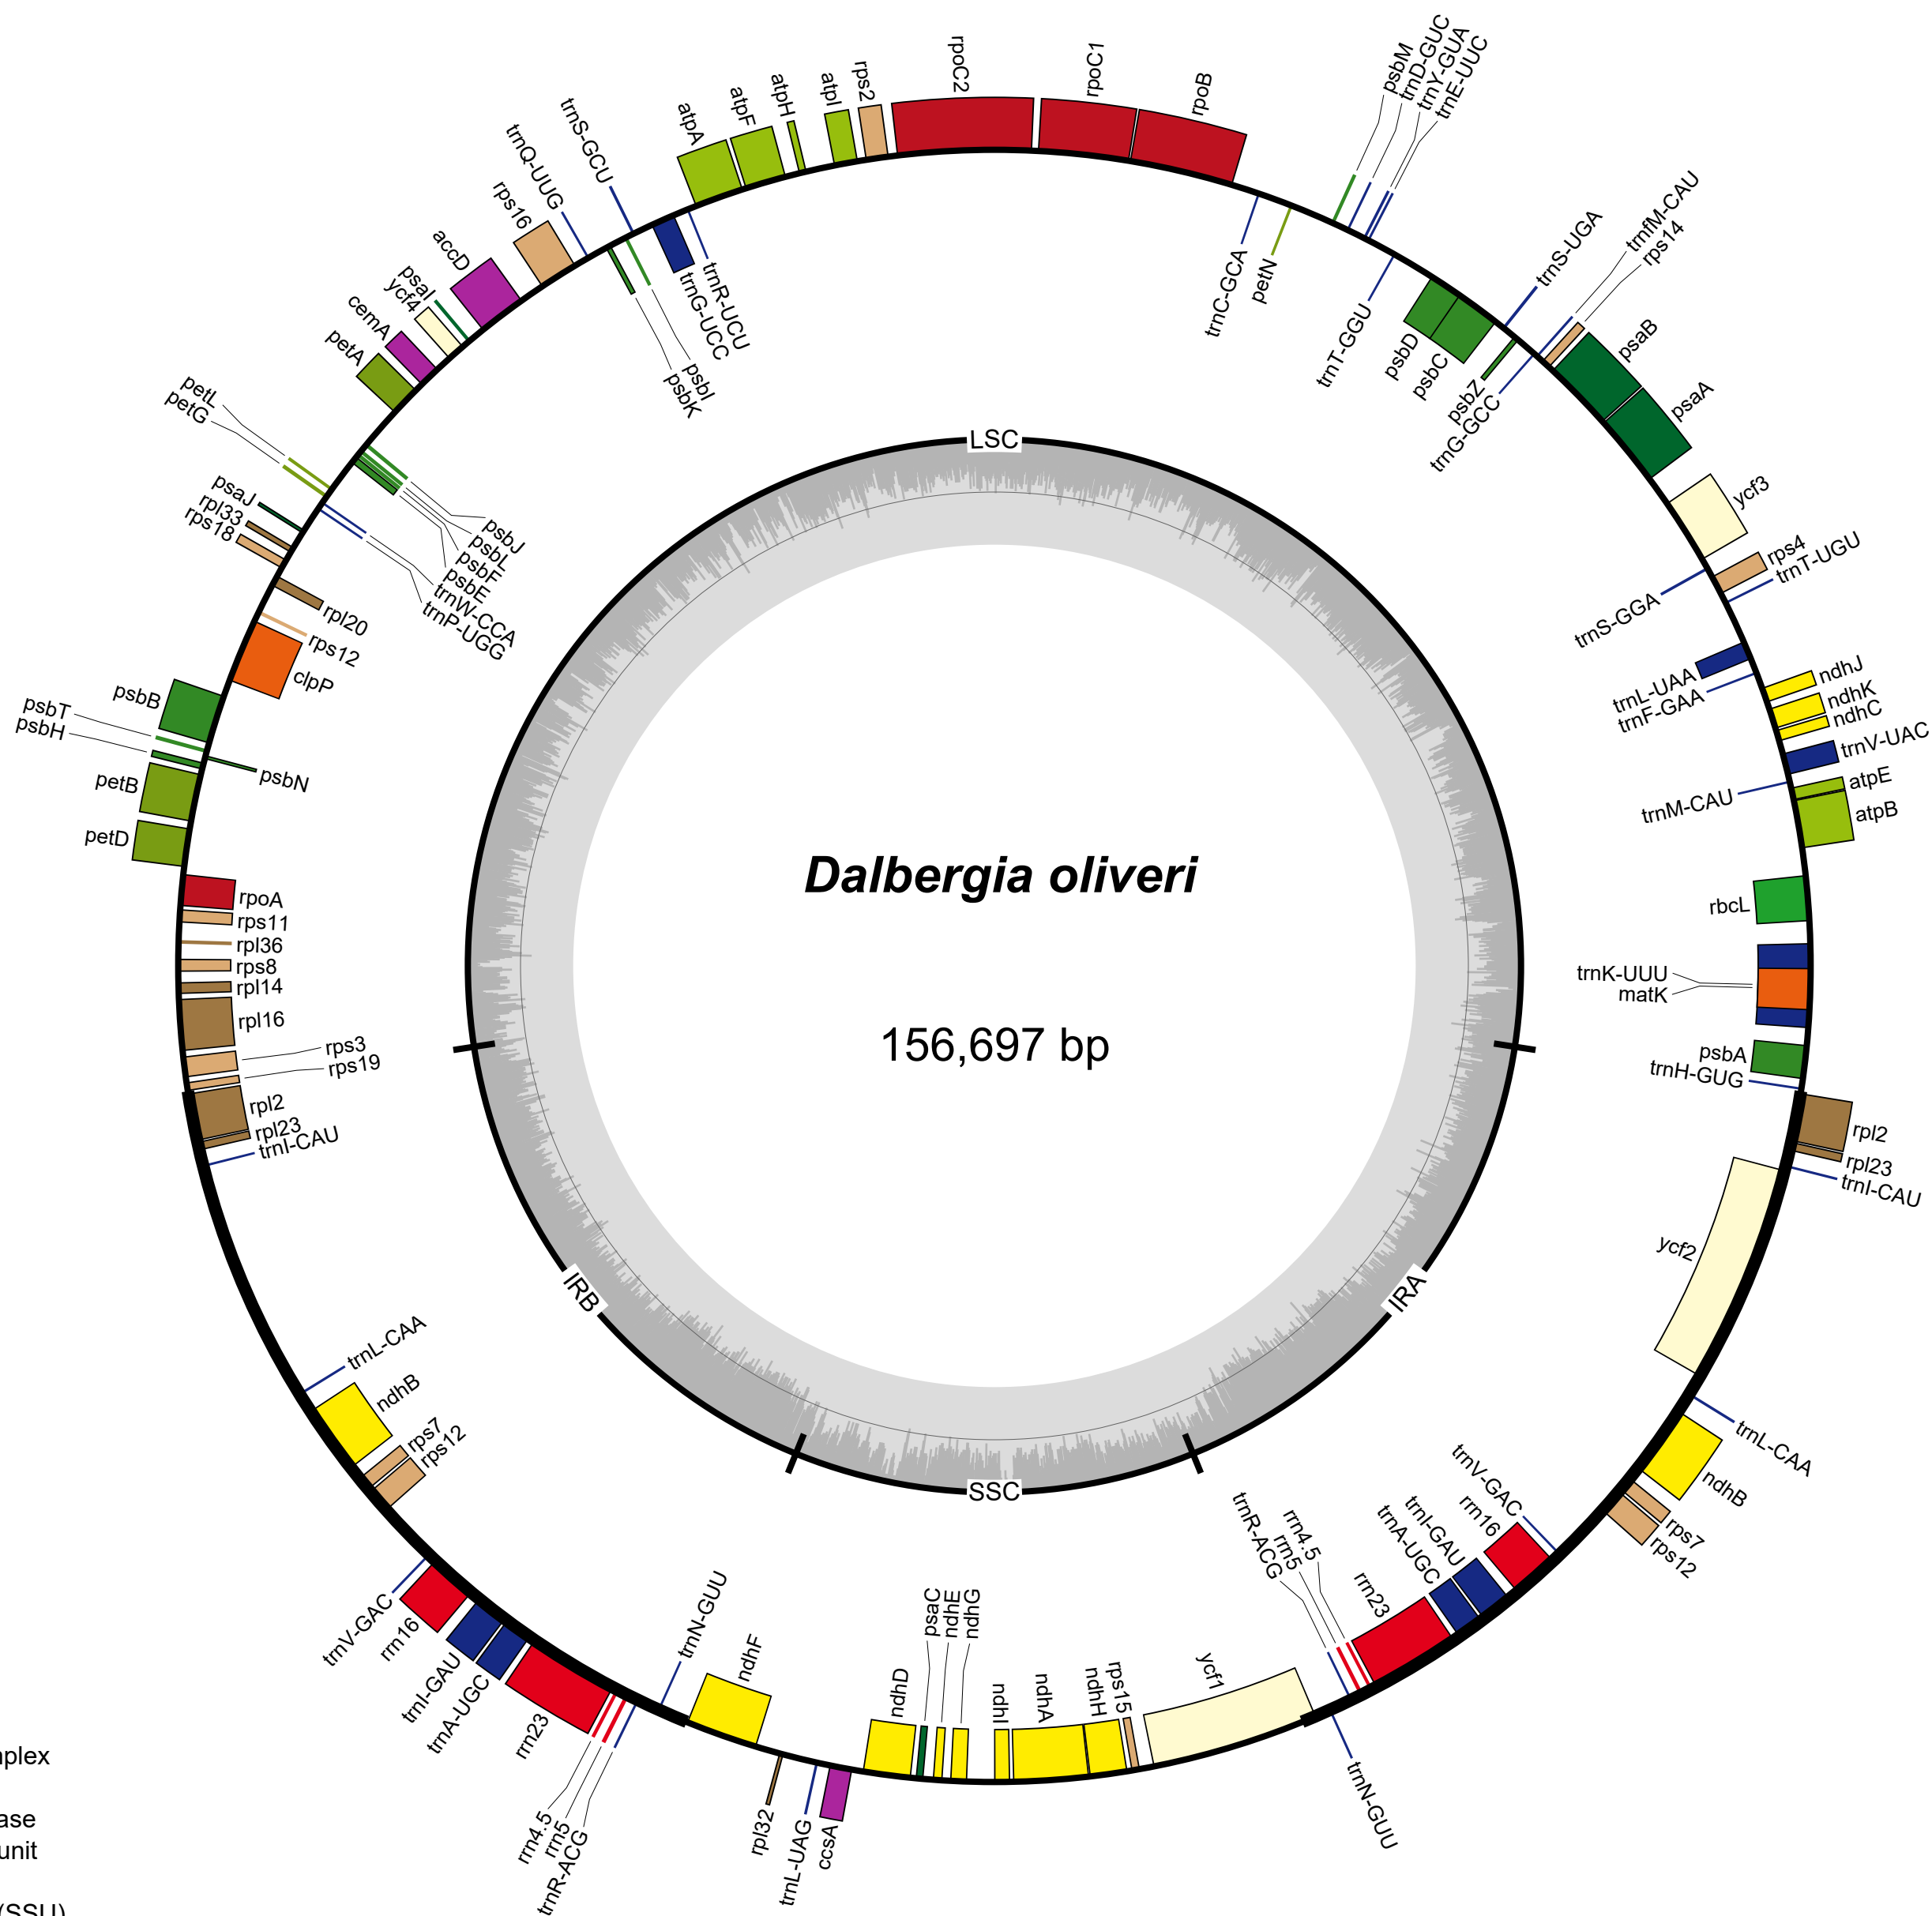

***Dalbergia oliveri***

156,697 bp

-  photosystem I
-  photosystem II
-  cytochrome b/f complex
-  ATP synthase
-  NADH dehydrogenase
-  RubisCO large subunit
-  RNA polymerase
-  ribosomal proteins (SSU)
-  ribosomal proteins (LSU)
-  clpP, matK
-  other genes
-  hypothetical chloroplast reading frames (ycf)
-  ORFs
-  transfer RNAs
-  ribosomal RNAs
-  origin of replication
-  polycistronic transcripts

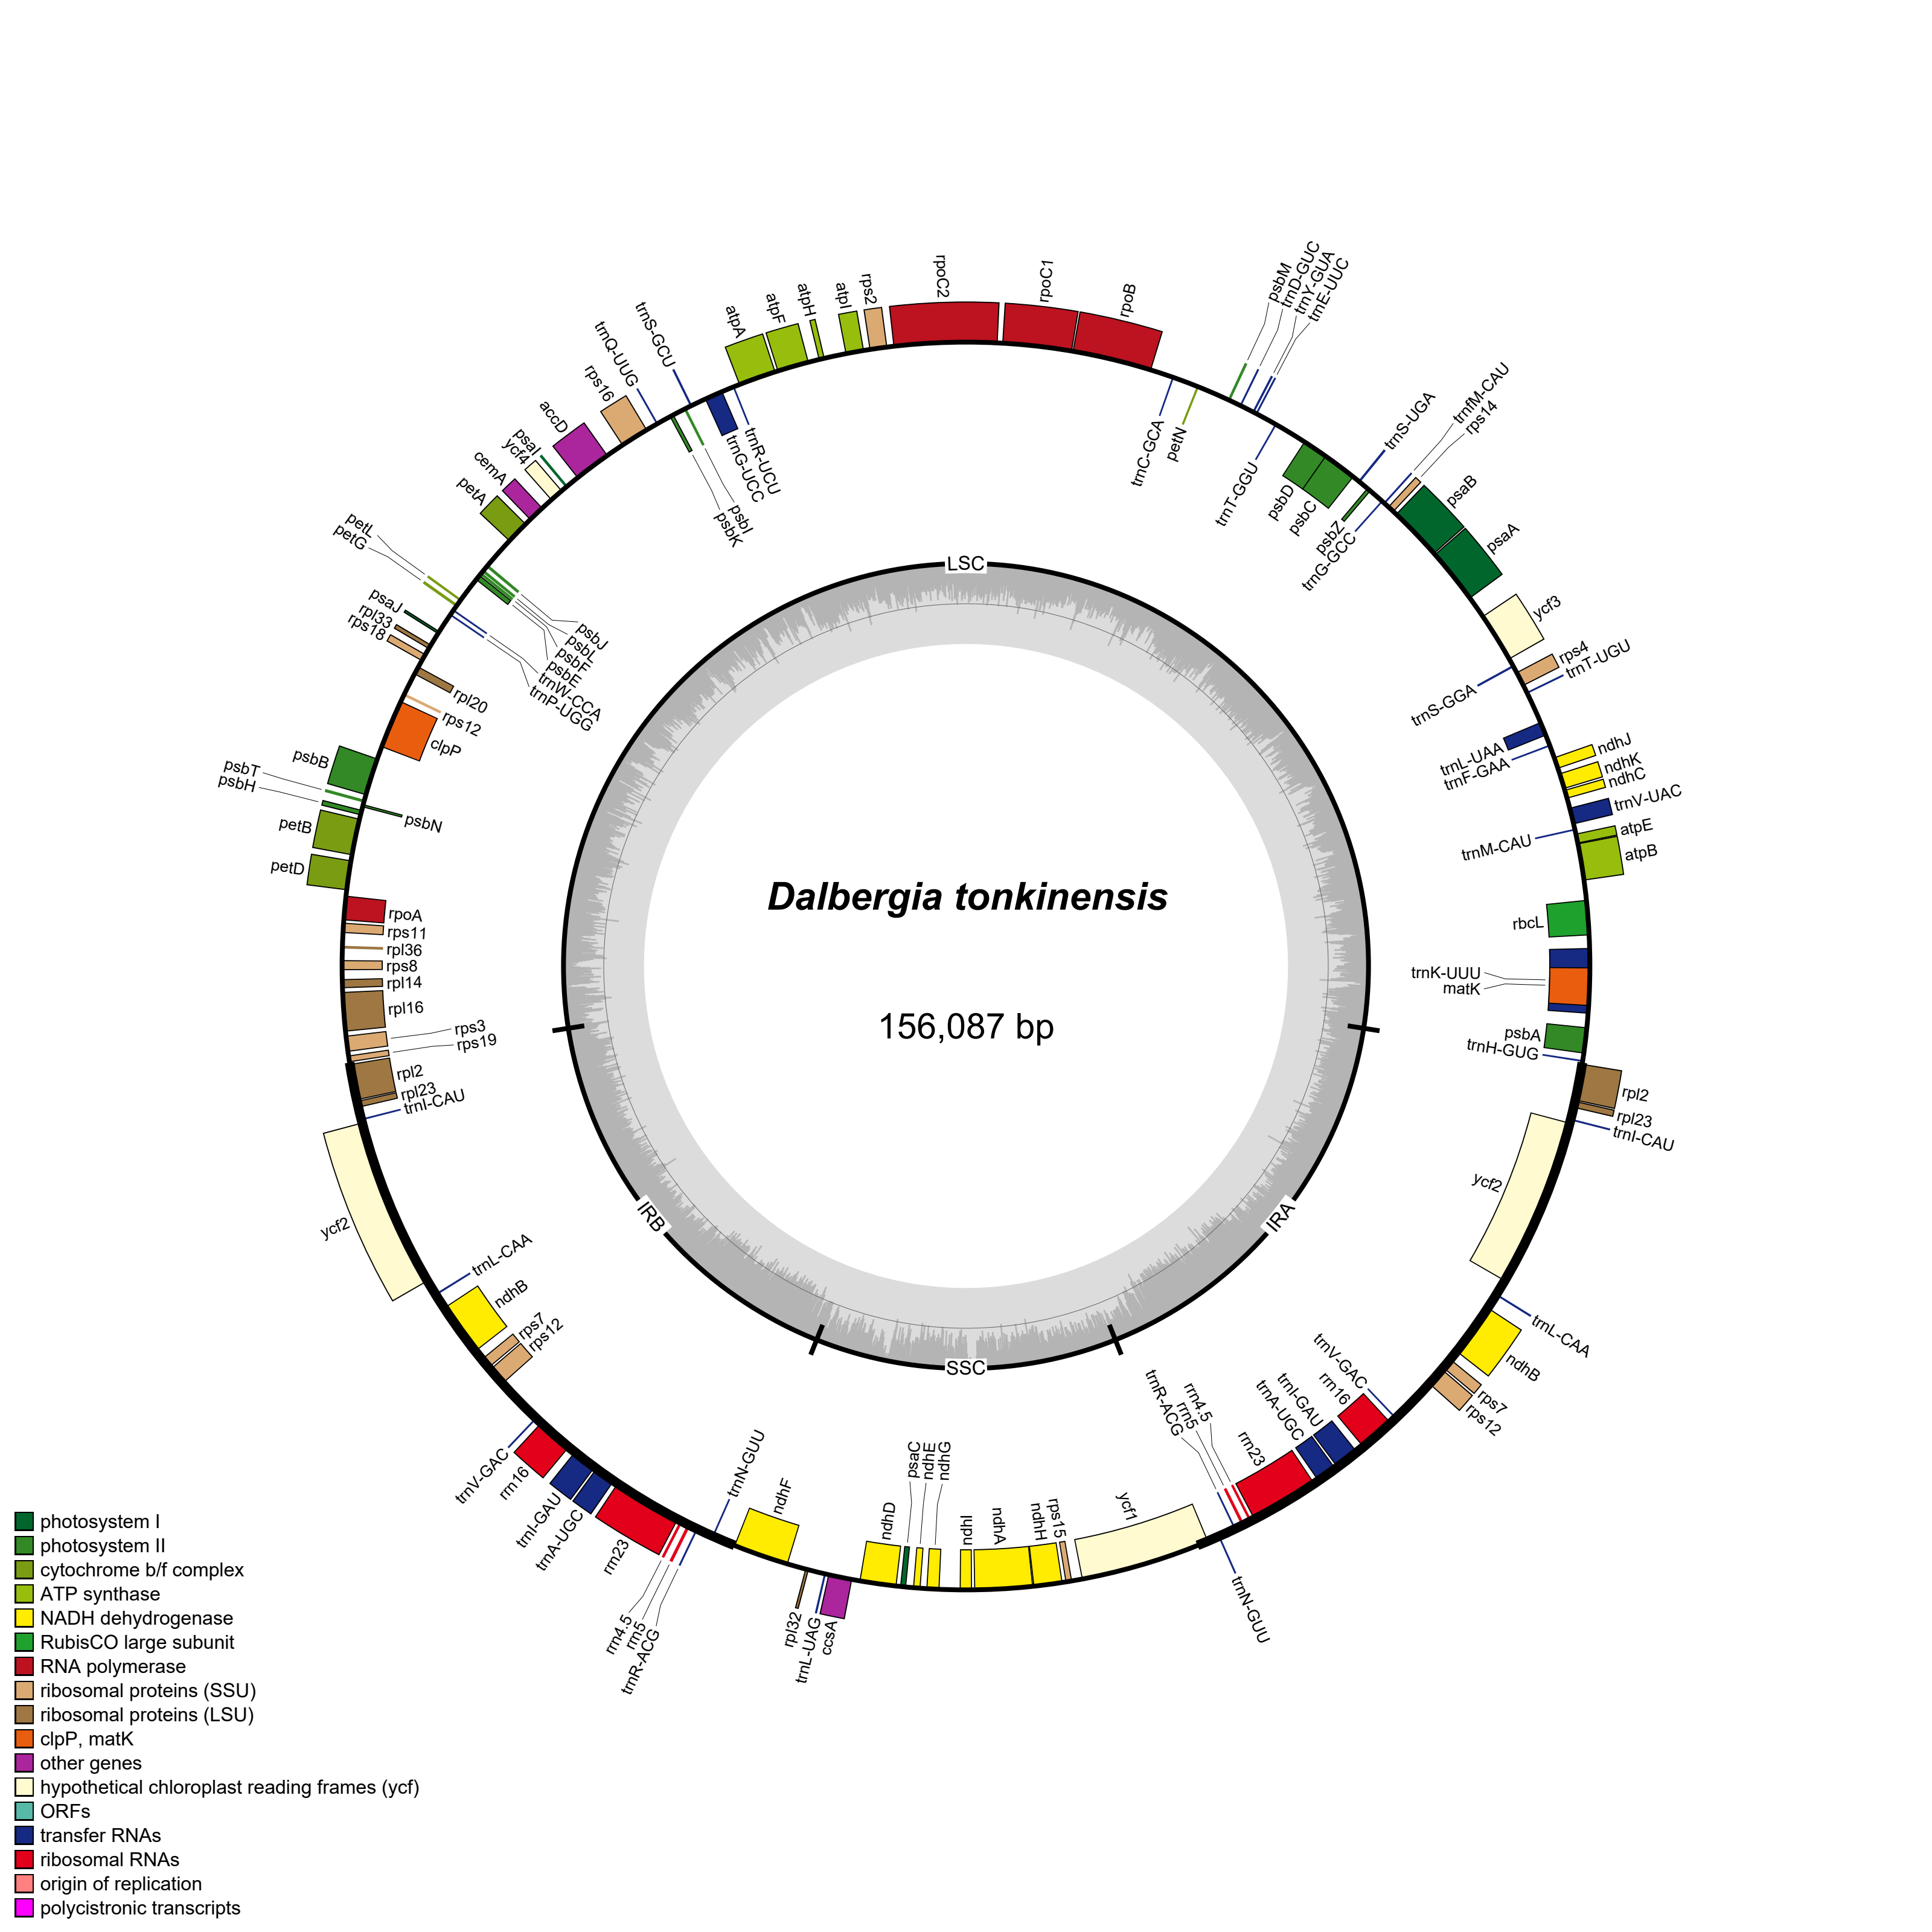

Supplement: s1 [file s1]
